# Supplementary material for: Mitophagy and cancer: role of BNIP3/BNIP3L as energetic drivers of stemness features, ATP production, proliferation, and cell migration
Source: publisher site journal article supplement (doi:10.18632/aging.205939), 2024-06-04
Supplement: Supplementary file [file aging-v16i11-205939-supplementary-material-SD1.pdf]

**SUPPLEMENTARY FIGURES**

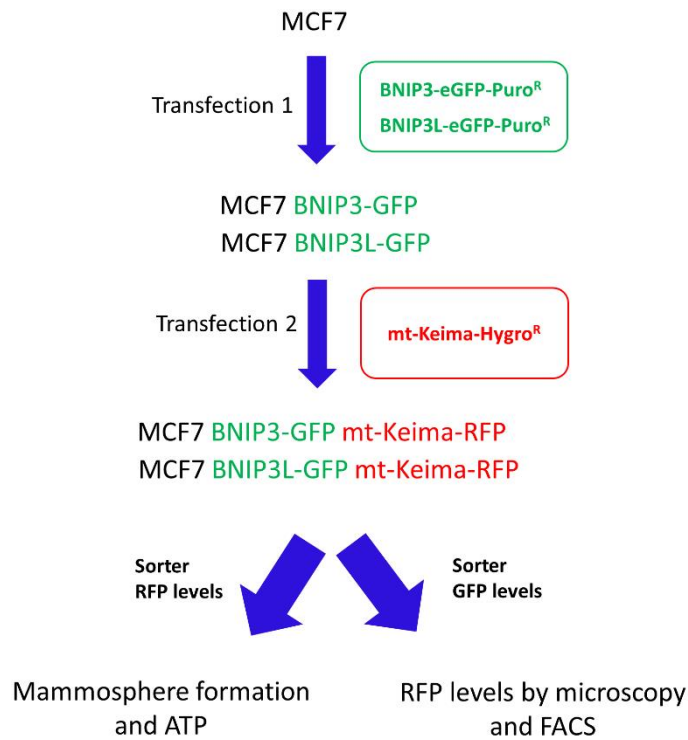

**Supplementary Figure 1. Derivation and analysis of MCF7 double-transfectants, harboring both BNIP3(L)-GFP and mt-Keima-RFP.**

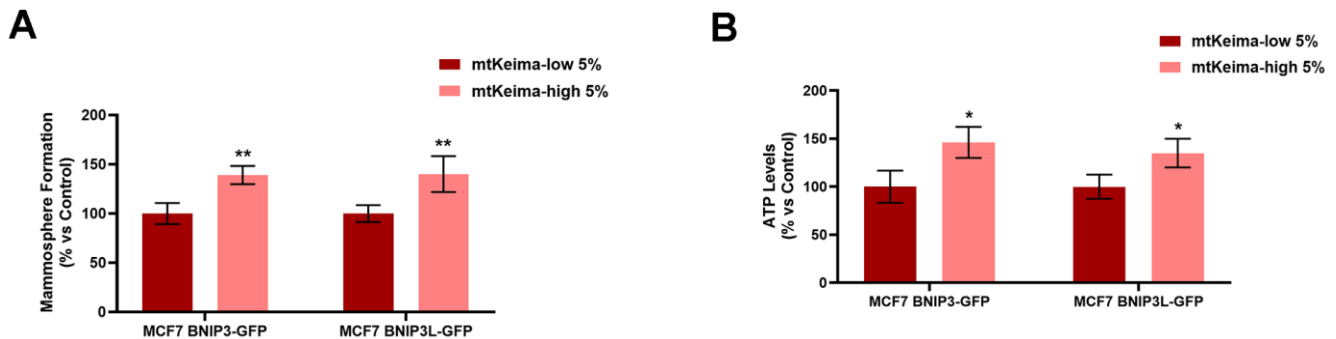

**Supplementary Figure 2. mtKeima RFP-high cells show increased ATP levels and elevated mammosphere formation.** MCF7 cells stably-transduced with the BNIP3(L)-GFP constructs were subjected to a new transfection with a mt-Keima-Hygro<sup>R</sup> construct obtaining two cell lines: MCF7 BNIP3-GFP mtKeima-RFP and MCF7 BNIP3L-GFP mtKeima-RFP. Both cell lines were sorting according the RFP levels to isolate the 5% highest RFP (mtKeima-high 5%) and the 5% lowest RFP (mtKeima-low 5%) subpopulations. **(A)** mtKeima-low 5% and mtKeima-high 5% subpopulations were seeded in low-attachment plates for mammosphere assays and analysed after 5 days. Data are shown as mean ± standard deviation (SD) (n = 4). Statistical significance was determined using an unpaired Student's t-test, \*\* p ≤ 0.01. **(B)** ATP levels were checked by CellTiter-Glo 2.0 Reagent in both subpopulations. Data are shown as mean ± standard deviation (SD) (n = 3). Statistical significance was determined using an unpaired Student's t-test, \*p ≤ 0.05.
